# Supplementary material
Source: MDPI journal article supplement (https://www.mdpi.com/2304-6767/10/3/37)
Supplement: s1 [file s1]

# VAS Questionnaire

- T0**

## VAS Aesthetics

Come valuti l'estetica dei denti anteriori? Dai un voto da 1 a 10, dove 1 significa "pessima estetica" e 10 significa "estetica eccellente".

*How do you evaluate the aesthetics of the anterior teeth? Rate it from 1 to 10, where 1 means "bad aesthetics" and 10 means "excellent aesthetics".*

|   |   |   |   |   |   |   |   |   |    |
|---|---|---|---|---|---|---|---|---|----|
| 1 | 2 | 3 | 4 | 5 | 6 | 7 | 8 | 9 | 10 |
|---|---|---|---|---|---|---|---|---|----|

## VAS Gingival Health

Come valuti la salute delle gengive intorno ai denti anteriori? (Sangue, dolore, infiammazione) Dai un voto da 1 a 10, dove 1 significa "pessima salute" e 10 significa "ottima salute".

*How do you assess the health of the gums around the anterior front teeth? (Blood, pain, inflammation) Rate it from 1 to 10, where 1 means "very poor health" and 10 means "excellent health".*

|   |   |   |   |   |   |   |   |   |    |
|---|---|---|---|---|---|---|---|---|----|
| 1 | 2 | 3 | 4 | 5 | 6 | 7 | 8 | 9 | 10 |
|---|---|---|---|---|---|---|---|---|----|

- T1**

## VAS Intra-op Pain

L'intervento è stato doloroso? Dai un voto da 1 a 10, dove 1 significa "nessun dolore" e 10 significa "dolore insopportabile".

*Was the surgery painful? Rate it from 1 to 10, where 1 means "no pain" and 10 means "unbearable pain".*

|   |   |   |   |   |   |   |   |   |    |
|---|---|---|---|---|---|---|---|---|----|
| 1 | 2 | 3 | 4 | 5 | 6 | 7 | 8 | 9 | 10 |
|---|---|---|---|---|---|---|---|---|----|

## VAS Intra-op Stress T1

L'intervento è stato stressante? Dai un voto da 1 a 10, dove 1 significa "nessuno stress" e 10 significa "stress insopportabile".

*Was the surgery stressful? Rate it from 1 to 10, where 1 means "no stress" and 10 means "unbearable stress".*

|   |   |   |   |   |   |   |   |   |    |
|---|---|---|---|---|---|---|---|---|----|
| 1 | 2 | 3 | 4 | 5 | 6 | 7 | 8 | 9 | 10 |
|---|---|---|---|---|---|---|---|---|----|

- T2**

## VAS Aesthetics

Come valuti l'estetica dei denti anteriori dopo l'esecuzione delle ricostruzioni? Dai un voto da 1 a 10, dove 1 significa "pessima estetica" e 10 significa "estetica eccellente".

*How do you evaluate the aesthetics of the anterior teeth after the reconstructions have been performed? Rate it from 1 to 10, where 1 means "bad aesthetics" and 10 means "excellent aesthetics".*

|   |   |   |   |   |   |   |   |   |    |
|---|---|---|---|---|---|---|---|---|----|
| 1 | 2 | 3 | 4 | 5 | 6 | 7 | 8 | 9 | 10 |
|---|---|---|---|---|---|---|---|---|----|

### **VAS Gingival Health**

Come valuti la salute delle gengive intorno ai denti anteriori trattati? (Sangue, dolore, infiammazione) Dai un voto da 1 a 10, dove 1 significa "pessima salute" e 10 significa "ottima salute".

*How do you assess the health of the gums around the treated front teeth? (Blood, pain, inflammation)*

*Rate it from 1 to 10, where 1 means "very poor health" and 10 means "excellent health".*

|   |   |   |   |   |   |   |   |   |    |
|---|---|---|---|---|---|---|---|---|----|
| 1 | 2 | 3 | 4 | 5 | 6 | 7 | 8 | 9 | 10 |
|---|---|---|---|---|---|---|---|---|----|
